# Supplementary material
Source: publisher figshare collection journal article supplement (https://acs.figshare.com/ndownloader/files/22437476)
Supplement: Supplementary file 1 [file 22437476]

## Sheet: Sheet1
Gene	Primer sequence F	Primer sequence R
TPS	TGATTGATGCCATCCAACGCCTAG	CGGAAGCCAAGTGCTAGTTCGTAG
DXS	TCAAGGAGGAGGTGGTGAAGAAGG	CTGGCGTGGGCGTTGAATCC
HMGCR	GAACTGCCACCAGGGAACAAAGG	CCAGCAAAGAAGACGCAACCAAAC
LOX2S	TTGCCATACGTGAGCGAAGTAAGG	TCCACTGCGGCTTCCCATCC
AOC	CATTGCGGATTTGGGTTGCTCATC	AAACTCAGGCGAACAAGGACGAC
LOX1_5	GGAACTCGCCCATTCAGATGTAGG	TGCCAGCATTTCTCGTCCAAACTC
